# Supplementary material
Source: Springer Nature journal article supplement (https://www.springermedizin.de/resource/supplementary/12885_2013_4039_MOESM2_ESM.pdf/9465086)
Supplement: MOESM2 [file 9465086]

Patients screened tumour board 2006 –2008  
Breast Cancer receptor positive with Indication AI  
n=321

Patients offered study participation after prescreening  
n=202

Patients randomized  
n=181

Patients excluded shortly after randomisation -  
no intervention performed, not analysed (per protocol) n=10

Control group 57

Letter group 57

Telephone group 57
